# Supplementary material for: Low Circulating Monocytes Is in Parallel With Lymphopenia Which Predicts Poor Outcome in Anti-melanoma Differentiation-Associated Gene 5 Antibody-Positive Dermatomyositis-Associated Interstitial Lung Disease
Source: PubMed Central journal article supplement (PMC8802832; doi:10.3389/fmed.2021.808875), 2022-01-17
Supplement: Data_Sheet_1.pdf [file Data_Sheet_1.pdf]

**Supplementary Material 1. Comparison of absolute and average lymphocyte and monocyte count between two cohorts.**

**Mann-Whitney test.**

|                                                      | discovery cohort              | n   | validation cohort             | n   | p value      |
|------------------------------------------------------|-------------------------------|-----|-------------------------------|-----|--------------|
| <b>Absolute lymphocyte count (x10<sup>9</sup>/L)</b> |                               |     |                               |     |              |
| <i>Lymph W0</i>                                      | 0.7975 ± 0.5410 (0.09-4.37)   | 235 | 0.7437 ± 0.4340 (0.06-2.40)   | 115 | 0.523        |
| <i>Lymph W1</i>                                      | 0.9213 ± 0.5858 (0.13-2.77)   | 198 | 0.7205 ± 0.4456 (0.10-3.04)   | 92  | <b>0.009</b> |
| <i>Lymph W2</i>                                      | 0.8092 ± 0.5789 (0.05-3.36)   | 160 | 0.6763 ± 0.4227 (0.09-1.95)   | 72  | 0.151        |
| <i>Lymph W3</i>                                      | 0.7907 ± 0.6548 (0.07-3.54)   | 108 | 0.7235 ± 0.7562 (0.16-4.66)   | 43  | 0.380        |
| <i>Lymph W4</i>                                      | 0.9809 ± 0.6319 (0.05-3.38)   | 131 | 1.016 ± 0.8717 (0.16-4.46)    | 48  | 0.529        |
| <b>Absolute monocyte count (x10<sup>9</sup>/L)</b>   |                               |     |                               |     |              |
| <i>Mono W0</i>                                       | 0.3779 ± 0.2177 (0.00-1.08)   | 234 | 0.3743 ± 0.2099 (0.03-1.08)   | 115 | 0.893        |
| <i>Mono W1</i>                                       | 0.4202 ± 0.2479 (0.02-1.28)   | 198 | 0.3791 ± 0.2194 (0.04-1.12)   | 92  | 0.205        |
| <i>Mono W2</i>                                       | 0.3549 ± 0.2476 (0.03-1.48)   | 160 | 0.3421 ± 0.2264 (0.04-1.26)   | 72  | 0.771        |
| <i>Mono W3</i>                                       | 0.3403 ± 0.2567 (0.00-1.73)   | 108 | 0.3351 ± 0.3420 (0.03-2.07)   | 43  | 0.385        |
| <i>Mono W4</i>                                       | 0.3466 ± 0.1914 (0.03-0.91)   | 131 | 0.4206 ± 0.3218 (0.02-1.40)   | 48  | 0.588        |
| <b>Average lymphocyte count (x10<sup>9</sup>/L)</b>  |                               |     |                               |     |              |
| <i>Lymph W0-1</i>                                    | 0.8483 ± 0.4872 (0.090-3.260) | 235 | 0.7435 ± 0.3882 (0.155-2.720) | 115 | 0.062        |
| <i>Lymph W0-2</i>                                    | 0.8474 ± 0.4852 (0.113-3.260) | 235 | 0.7401 ± 0.3927 (0.133-2.720) | 116 | <b>0.047</b> |
| <i>Lymph W0-3</i>                                    | 0.8484 ± 0.4937 (0.113-3.260) | 235 | 0.7484 ± 0.4309 (0.133-3.367) | 116 | 0.060        |
| <i>Lymph W0-4</i>                                    | 0.8602 ± 0.4794 (0.113-2.633) | 235 | 0.7834 ± 0.4443 (0.133-3.367) | 116 | 0.137        |
| <b>Average monocyte count (x10<sup>9</sup>/L)</b>    |                               |     |                               |     |              |
| <i>Mono W0-1</i>                                     | 0.3982 ± 0.2001 (0.020-1.280) | 235 | 0.3767 ± 0.1857 (0.040-1.120) | 115 | 0.387        |
| <i>Mono W0-2</i>                                     | 0.3877 ± 0.1904 (0.045-1.070) | 235 | 0.3727 ± 0.1829 (0.080-0.913) | 116 | 0.476        |
| <i>Mono W0-3</i>                                     | 0.3805 ± 0.1877 (0.045-1.070) | 235 | 0.3770 ± 0.2034 (0.088-1.340) | 116 | 0.652        |
| <i>Mono W0-4</i>                                     | 0.3770 ± 0.1781 (0.045-1.070) | 235 | 0.3834 ± 0.2076 (0.098-1.340) | 116 | 0.829        |

**Supplementary Material 2. Average lymphocyte and monocyte count of both cohorts at baseline and during first four weeks after admission. Mann-Whitney test.**

|                   | discovery cohort |             |                | validation cohort |             |                |
|-------------------|------------------|-------------|----------------|-------------------|-------------|----------------|
|                   | non-survivor     | survivor    | <i>p</i> value | non-survivor      | survivor    | <i>p</i> value |
| <i>Lymph W0</i>   | 0.618±0.383      | 0.917±0.597 | <0.001         | 0.573±0.348       | 0.838±0.450 | <0.001         |
| <i>Lymph W0-1</i> | 0.651±0.361      | 0.980±0.516 | <0.001         | 0.560±0.300       | 0.845±0.396 | <0.001         |
| <i>Lymph W0-2</i> | 0.626±0.350      | 0.995±0.507 | <0.001         | 0.544±0.293       | 0.851±0.400 | <0.001         |
| <i>Lymph W0-3</i> | 0.622±0.364      | 1.000±0.512 | <0.001         | 0.546±0.306       | 0.863±0.451 | <0.001         |
| <i>Lymph W0-4</i> | 0.626±0.378      | 1.017±0.477 | <0.001         | 0.557±0.305       | 0.912±0.461 | <0.001         |
| <i>Mono W0</i>    | 0.373±0.239      | 0.381±0.203 | 0.347          | 0.322±0.184       | 0.403±0.219 | 0.040          |
| <i>Mono W0-1</i>  | 0.368±0.214      | 0.418±0.188 | 0.009          | 0.307±0.150       | 0.415±0.193 | 0.003          |
| <i>Mono W0-2</i>  | 0.348±0.197      | 0.414±0.182 | 0.002          | 0.313±0.165       | 0.407±0.185 | 0.005          |
| <i>Mono W0-3</i>  | 0.335±0.191      | 0.410±0.180 | 0.001          | 0.311±0.166       | 0.414±0.214 | 0.006          |
| <i>Mono W0-4</i>  | 0.323±0.181      | 0.413±0.167 | <0.001         | 0.310±0.164       | 0.425±0.219 | 0.002          |

Supplementary Material 3. Relationship between average lymphocytes/monocytes/PBMC in the first two weeks and other prognostic factors in the discovery cohort.  $p < 0.05$ , Pearson analysis and Spearman analysis.

|                                                    | <i>Mono W0-2</i> |                  | <i>Lymph W0-2</i> |                  | <i>PBMC W0-2</i> |                  |
|----------------------------------------------------|------------------|------------------|-------------------|------------------|------------------|------------------|
|                                                    | r                | Sig.             | r                 | Sig.             | r                | Sig.             |
| <b>FVC (n=186)</b>                                 | 0.109            | 0.139            | 0.219             | <b>0.003</b>     | 0.211            | <b>0.004</b>     |
| <b>OI (n=235)*</b>                                 | 0.246            | <b>&lt;0.001</b> | 0.413             | <b>&lt;0.001</b> | 0.407            | <b>&lt;0.001</b> |
| <b>HRCT score (n=221)</b>                          | -0.252           | <b>&lt;0.001</b> | -0.416            | <b>&lt;0.001</b> | -0.413           | <b>&lt;0.001</b> |
| <b>CRP (n=235)</b>                                 | -0.172           | <b>0.008</b>     | -0.123            | 0.059            | -0.152           | <b>0.019</b>     |
| <b>SF (n=232)</b>                                  | -0.080           | 0.223            | -0.197            | <b>0.003</b>     | -0.183           | <b>0.005</b>     |
| <b>LDH (n=230)</b>                                 | -0.287           | <b>&lt;0.001</b> | -0.322            | <b>&lt;0.001</b> | -0.348           | <b>&lt;0.001</b> |
| <b>Ulcers (n=235)</b>                              | -0.021           | 0.751            | -0.043            | 0.515            | -0.028           | 0.670            |
| <b>Arthritis (n=235)</b>                           | -0.018           | 0.787            | 0.045             | 0.491            | 0.014            | 0.827            |
| <b>Muscular involvement (n=235)</b>                | -0.016           | 0.805            | -0.014            | 0.829            | -0.018           | 0.789            |
| <b>Pneumomediastinum<br/>/Pneumothorax (n=235)</b> | -0.130           | <b>0.046</b>     | -0.231            | <b>&lt;0.001</b> | -0.213           | <b>0.001</b>     |

\*OI, oxygenation index.
